# Supplementary material for: JCDB: a comprehensive knowledge base for Jatropha curcas, an emerging model for woody energy plants
Source: PubMed Central journal article supplement (PMC6929279; doi:10.1186/s12864-019-6356-z), 2019-12-24

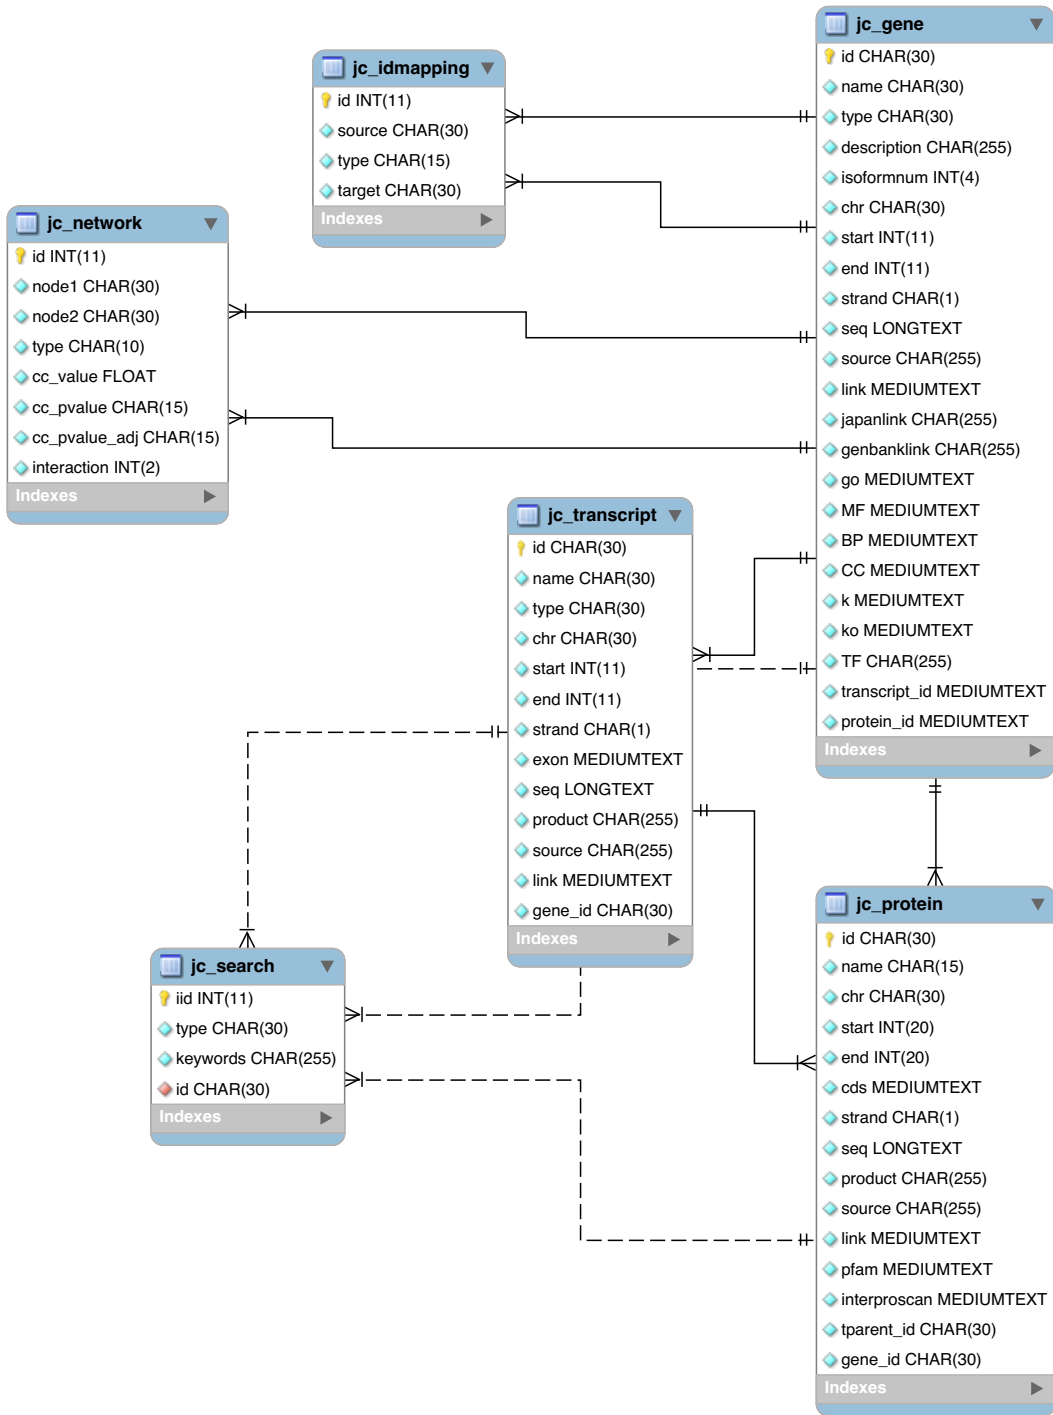

Supplement: 12864_2019_6356_MOESM2_ESM.pdf [file 12864_2019_6356_MOESM2_ESM.pdf]
